# Supplementary material for: Nanoparticle-mediated conversion of primary human astrocytes into neurons and oligodendrocytes
Source: Royal Society of Chemistry journal article supplement (doi:10.1039/c6bm00140h), 2016-01-01
Supplement: c6bm00140h1.pdf [file c6bm00140h1.pdf]

### Figure and Table Captions

**Fig. S1.** Fabrication of spheroids of GFP, Sox2-GFP, or Olig2-GFP transfected astrocytes by an agarose hydrogel microwell. Cell seeding density was kept at  $2 \times 10^6$  cells/mL. Scale bar = 200  $\mu\text{m}$ .

**Fig. S2.** GFP expressing in astrocyte spheroids after direct transfection of pre-formed spheroids with PBAE 536 at the polymer/DNA ratio of 60 w/w and varied DNA doses of 1, 3, 4.5, 6, and 9  $\mu\text{g}/10^6$  cells at days 2, 4, and 7. Scale bar = 200  $\mu\text{m}$ .

**Fig. S3.** GFP expressing in astrocyte spheroids after concurrent transfection of single cells with PBAE 536 at the polymer/DNA ratio of 60 w/w and varied DNA doses of 1, 3, 4.5, 6, and 9  $\mu\text{g}/10^6$  cells at days 2, 7, and 14. Scale bar = 200  $\mu\text{m}$ .

**Fig. S4.** Immunostaining of astrocytes at day 2 after transfection with PBAE 536 nanoparticles containing plasmid encoding Sox2-GFP. Cells were stained with Sox2 (red), Olig1 (red), PDGFR $\alpha$  (red), O4 (red), and MAP2 (red), respectively. Cell nuclei were stained with blue by DAPI. Scale bar = 200  $\mu\text{m}$ .

**Fig. S5.** Immunostaining of astrocytes at day 4 after transfection with PBAE 536 nanoparticles containing plasmid encoding Sox2-GFP. Cells were stained with Sox2 (red), Olig1 (red), PDGFR $\alpha$  (red), O4 (red), A2B5 (red), and MAP2 (red), respectively. Cell nuclei were stained with blue by DAPI. Scale bar = 200  $\mu\text{m}$ .

**Fig. S6.** Immunostaining of astrocytes at day 4 after transfection with PBAE 536 nanoparticles containing plasmid encoding Olig2-GFP. Cells were stained with nestin (red), PDGFR $\alpha$  (red), Tuj1 (red), and MAP2 (red), respectively. Cell nuclei were stained with blue by DAPI. Scale bar = 200  $\mu$ m.

**Table S1.** Primers used in this study.

**Table S2.** Primary antibodies used in this study.

**Table S3.** Number average (Mn) and molecular weight (Mw) measurements with gel permeation chromatography (GPC), and average degrees of polymerization (DP) of the PBAE polymers used in this study.

**Table S4.** N/P ratios and weight ratios of all PBAE polymer/DNA used in this study.
