# Supplementary material for: Nanoparticle-mediated conversion of primary human astrocytes into neurons and oligodendrocytes
Source: Royal Society of Chemistry journal article supplement (doi:10.1039/c6bm00140h), 2016-01-01
Supplement: c6bm00140h8.pdf [file c6bm00140h8.pdf]

| <b>Primer</b>  | <b>Catalog Number</b> |
|----------------|-----------------------|
| Nestin         | Hs04187831_g1         |
| Tuj1           | Hs00964963_g1         |
| GFAP           | Hs00909233_m1         |
| S100B          | Hs00366918_m1         |
| PDGFR $\alpha$ | Hs00964426_m1         |
| Olig1          | Hs00744293_s1         |
| CNP            | Hs00263981_m1         |
| GAPDH          | Hs99999905_m1         |

---

| <b>Antibody</b> | <b>Company</b>     | <b>Catalog Number</b> |
|-----------------|--------------------|-----------------------|
| Olig2           | Sigma              | SAB1412293            |
| Sox2            | Sigma              | SAB5300177            |
| Nestin          | Santa Cruz Biotech | SC20978               |
| Tuj1            | Sigma              | T8660                 |
| MAP2            | Millipore          | MAB3418               |
| GFAP            | DAKO               | Z0334                 |
| Olig1           | Santa Cruz Biotech | SC48787               |
| A2B5            | Sigma              | A8229                 |
| PDGFR $\alpha$  | Santa Cruz Biotech | SC338                 |
| O4              | Sigma              | O7139                 |

---

| <b>Polymer</b> | <b>B:S Ratio</b> | <b>Mn (Da)</b> | <b>Mw (Da)</b> | <b>DP</b> |
|----------------|------------------|----------------|----------------|-----------|
| 446            | 1.1:1            | 3342           | 6398           | 11        |
| 447            | 1.1:1            | 11345          | 36814          | 38        |
| 456            | 1.2:1            | 4208           | 110715         | 13        |
| 536            | 1.1:1            | 4876           | 8468           | 16        |
| 537            | 1.05.1           | 14899          | 35287          | 51        |
| 546            | 1.1:1            | 4381           | 7912           | 14        |

| <b>Polymer</b> | <b>N/P Ratio</b> |               |               |
|----------------|------------------|---------------|---------------|
|                | <b>30 w/w</b>    | <b>60 w/w</b> | <b>90 w/w</b> |
| 446            | 43               | 86            | 130           |
| 447            | 38               | 76            | 114           |
| 456            | 40               | 80            | 119           |
| 536            | 40               | 81            | 121           |
| 537            | 37               | 74            | 111           |
| 546            | 40               | 79            | 119           |
