# Supplementary figures and images for: Nanoparticle-mediated conversion of primary human astrocytes into neurons and oligodendrocytes
Source: Royal Society of Chemistry journal article supplement (doi:10.1039/c6bm00140h), 2016-01-01

Non-transfected

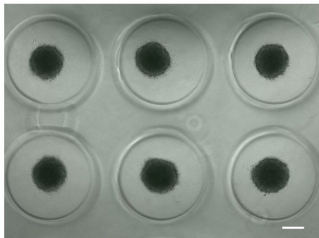

GFP

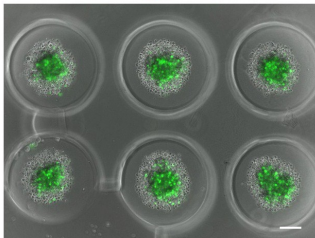

Sox2-GFP

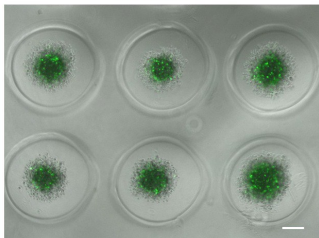

Olig2-GFP

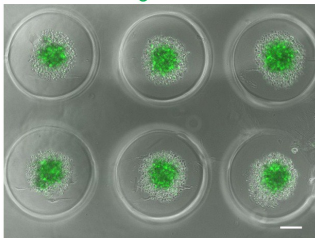

Supplement: c6bm00140h2.pdf [file c6bm00140h2.pdf]

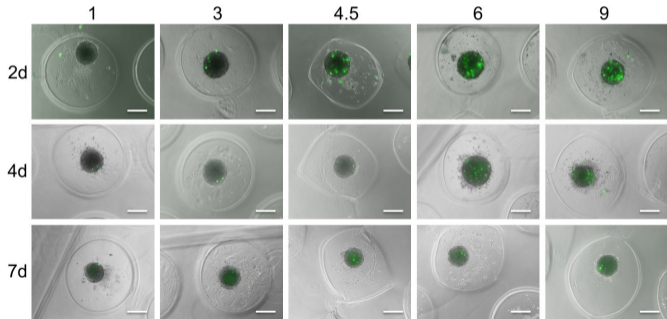

Supplement: c6bm00140h3.pdf [file c6bm00140h3.pdf]

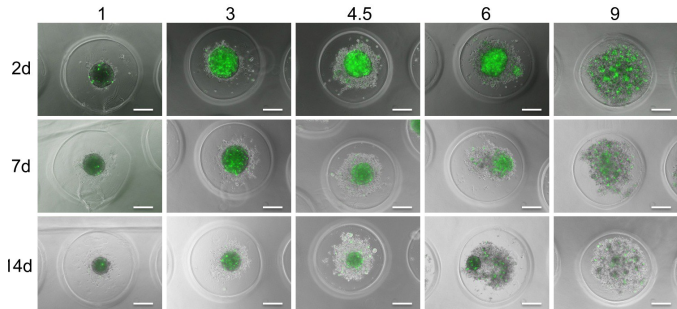

Supplement: c6bm00140h4.pdf [file c6bm00140h4.pdf]

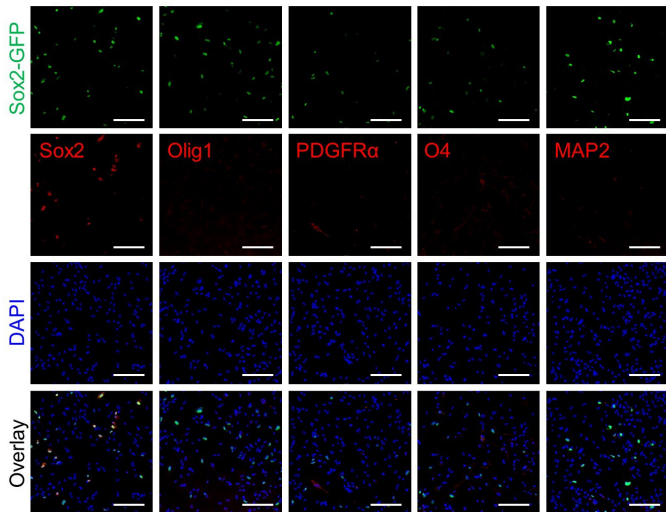

Supplement: c6bm00140h5.pdf [file c6bm00140h5.pdf]

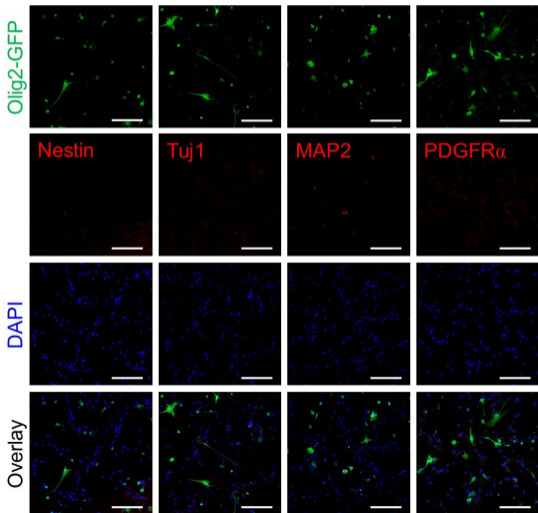

Supplement: c6bm00140h7.pdf [file c6bm00140h7.pdf]
